# Supplementary material
Source: publisher figshare collection journal article supplement (https://brill.figshare.com/articles/dataset/_/1564711)

# Reimarus - Wetken Families

## Chart 4

**Bold** print means the person appears in the account books

### KEY

- \* born
- ~ baptized
- ∞ married
- children
- † died

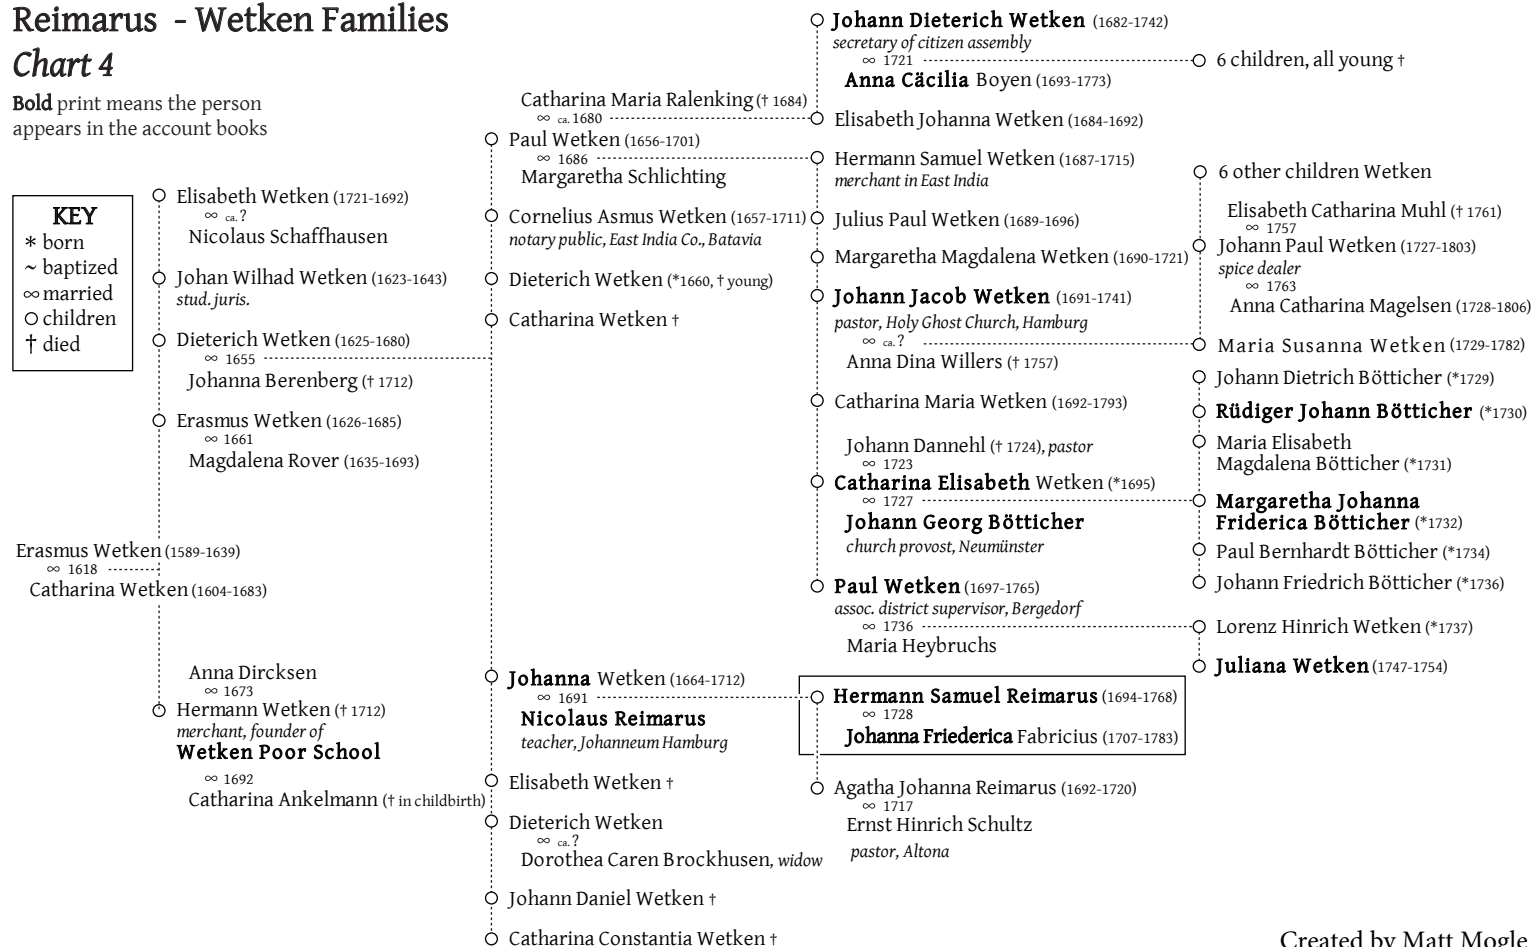

Supplement: Supplementary file 1 [file 1]
