# Supplementary material
Source: publisher figshare collection journal article supplement (https://brill.figshare.com/articles/dataset/_/1564711)

# Reimarus - Fabricius - Evers - Müller Families

## Chart 2

**Bold** print means the person  
appears in the account books

**KEY**  
\* born  
~ baptized  
∞ married  
○ children  
† died

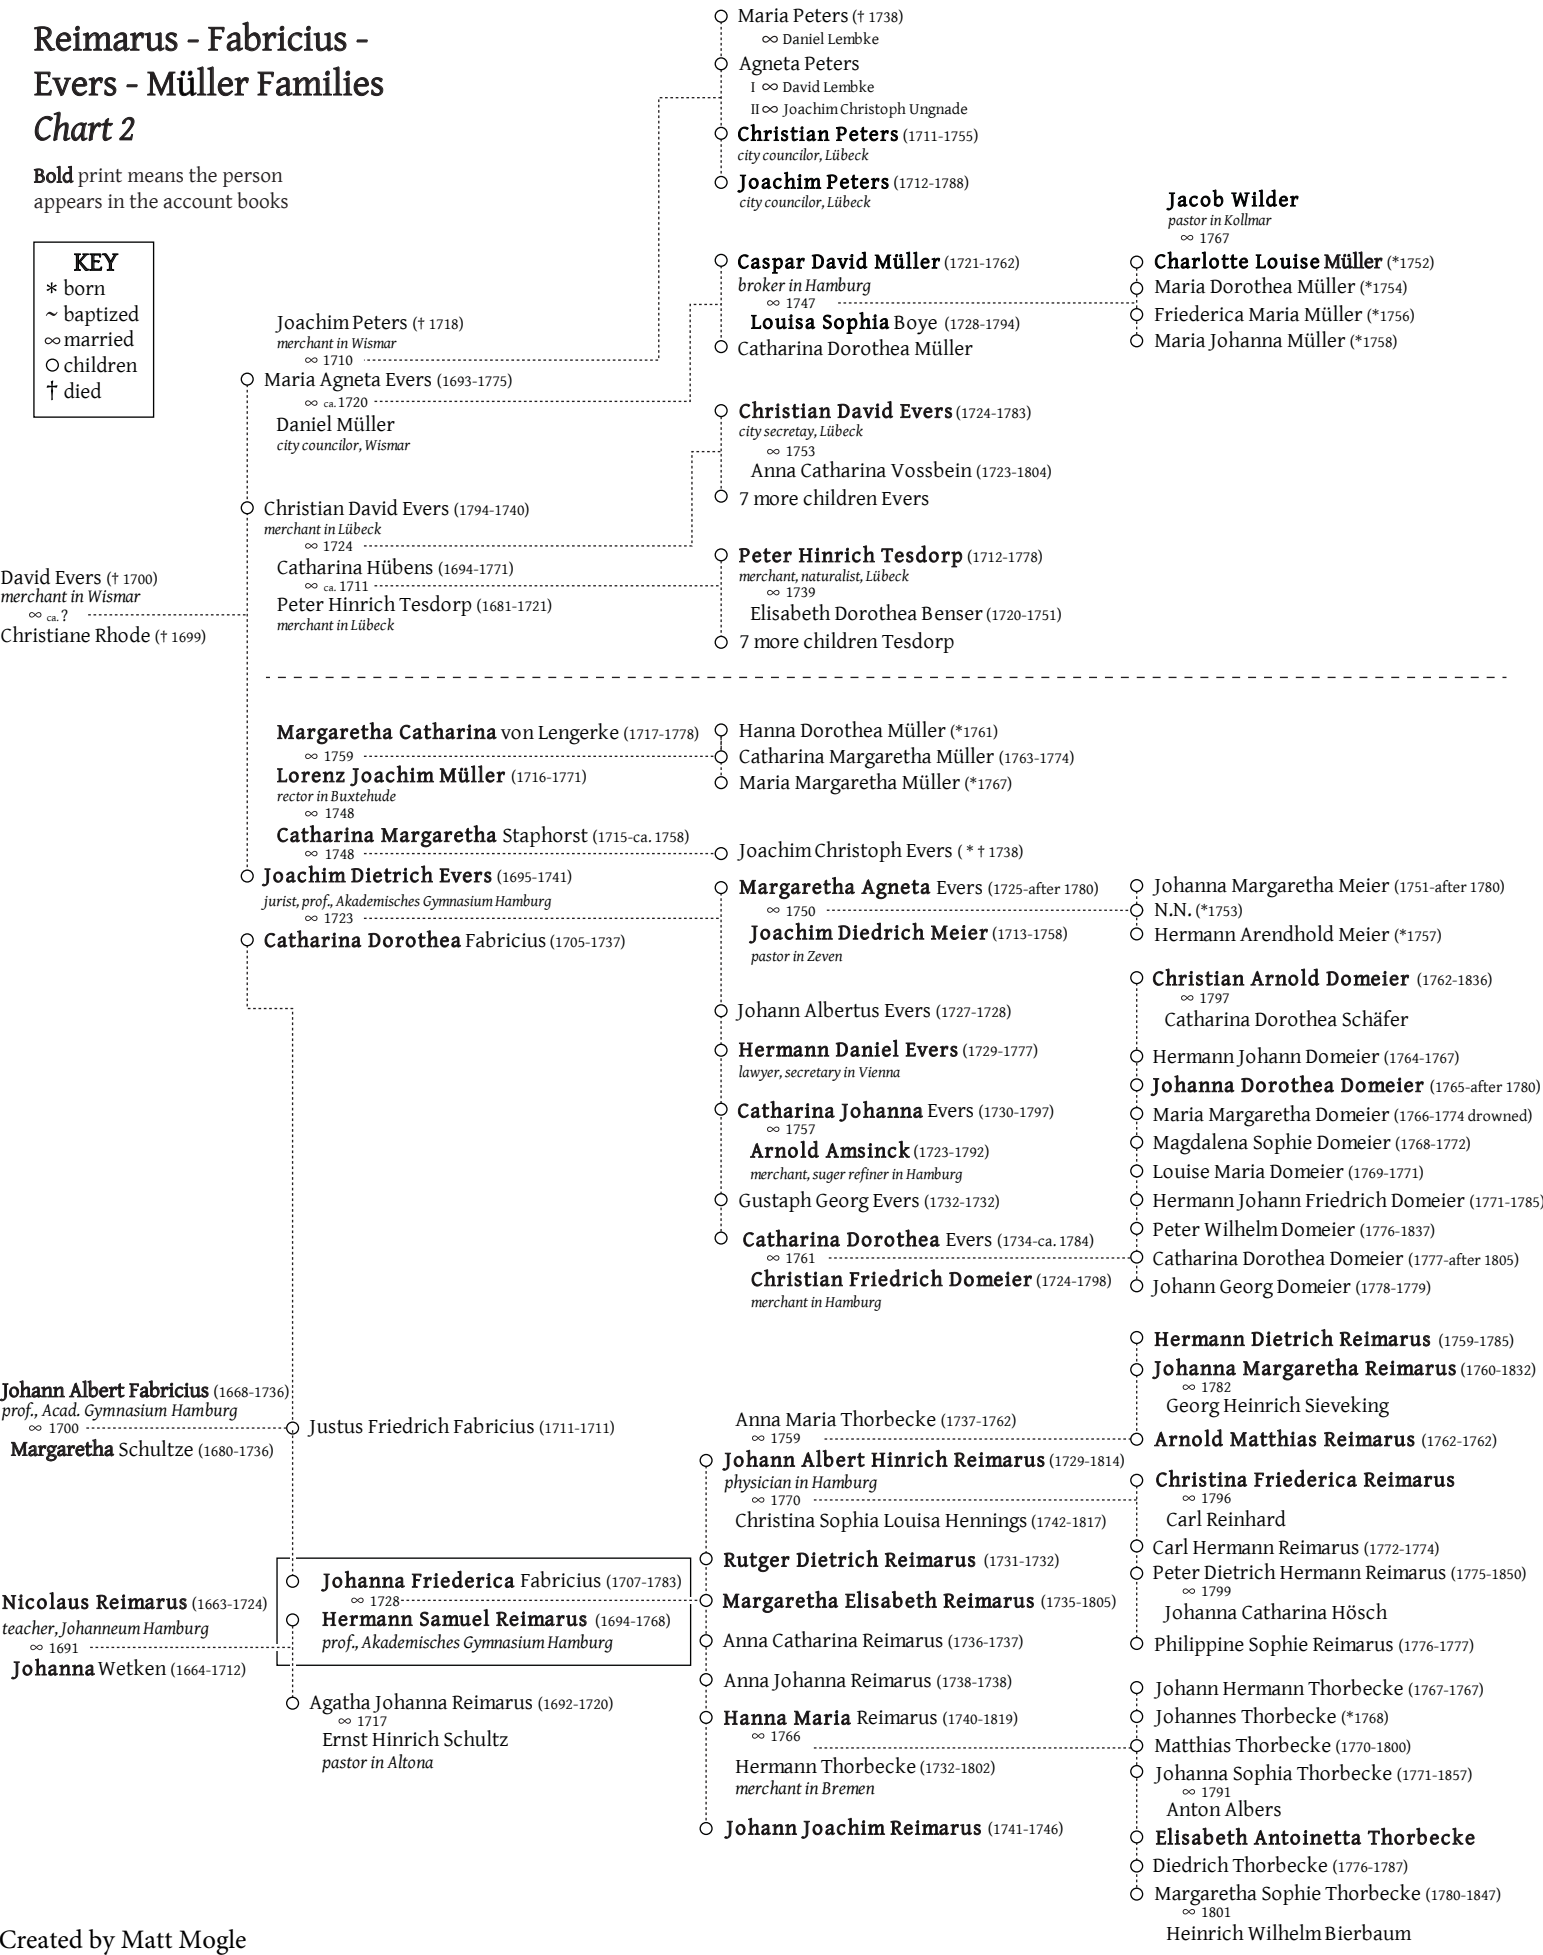

Supplement: Supplementary file 2 [file 1]
