# Supplementary material
Source: publisher figshare collection journal article supplement (https://brill.figshare.com/articles/dataset/_/1564711)

### Chart 3

10/10

|                               |  |
|-------------------------------|--|
| Colaus Reimarus               |  |
| stor, Luckow near Ueckermünde |  |
| ca. ?                         |  |
| Benigna Wegener               |  |

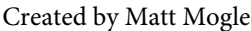

Supplement: Supplementary file 3 [file 1]

Reimarus Household  
1728-1783

Chart 1

Core Family

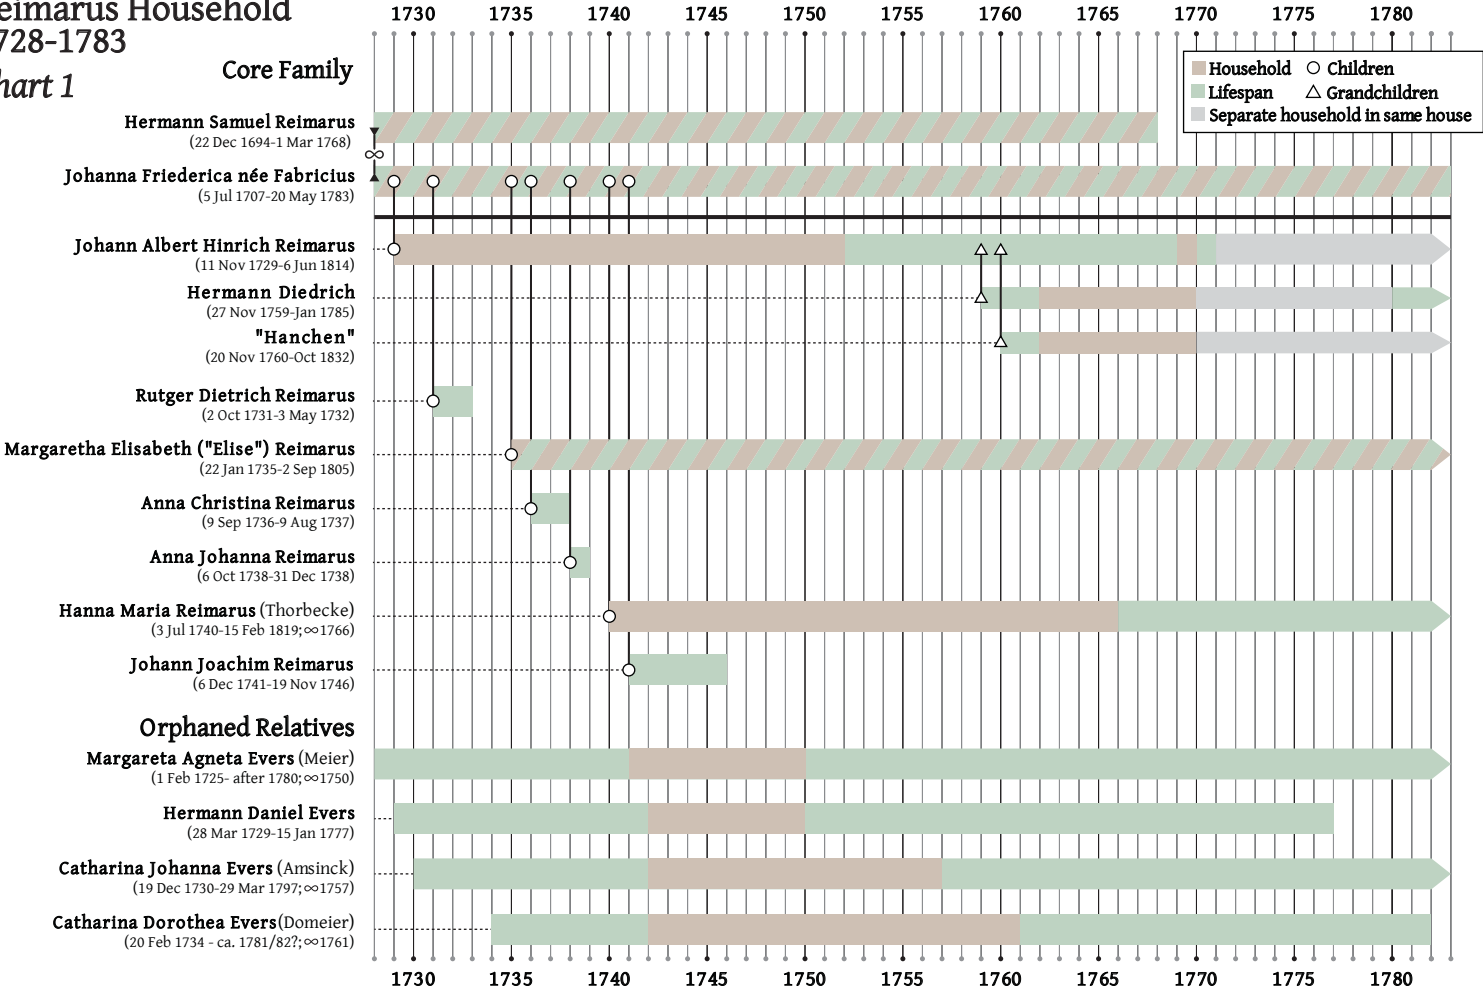

Domestic Personnel

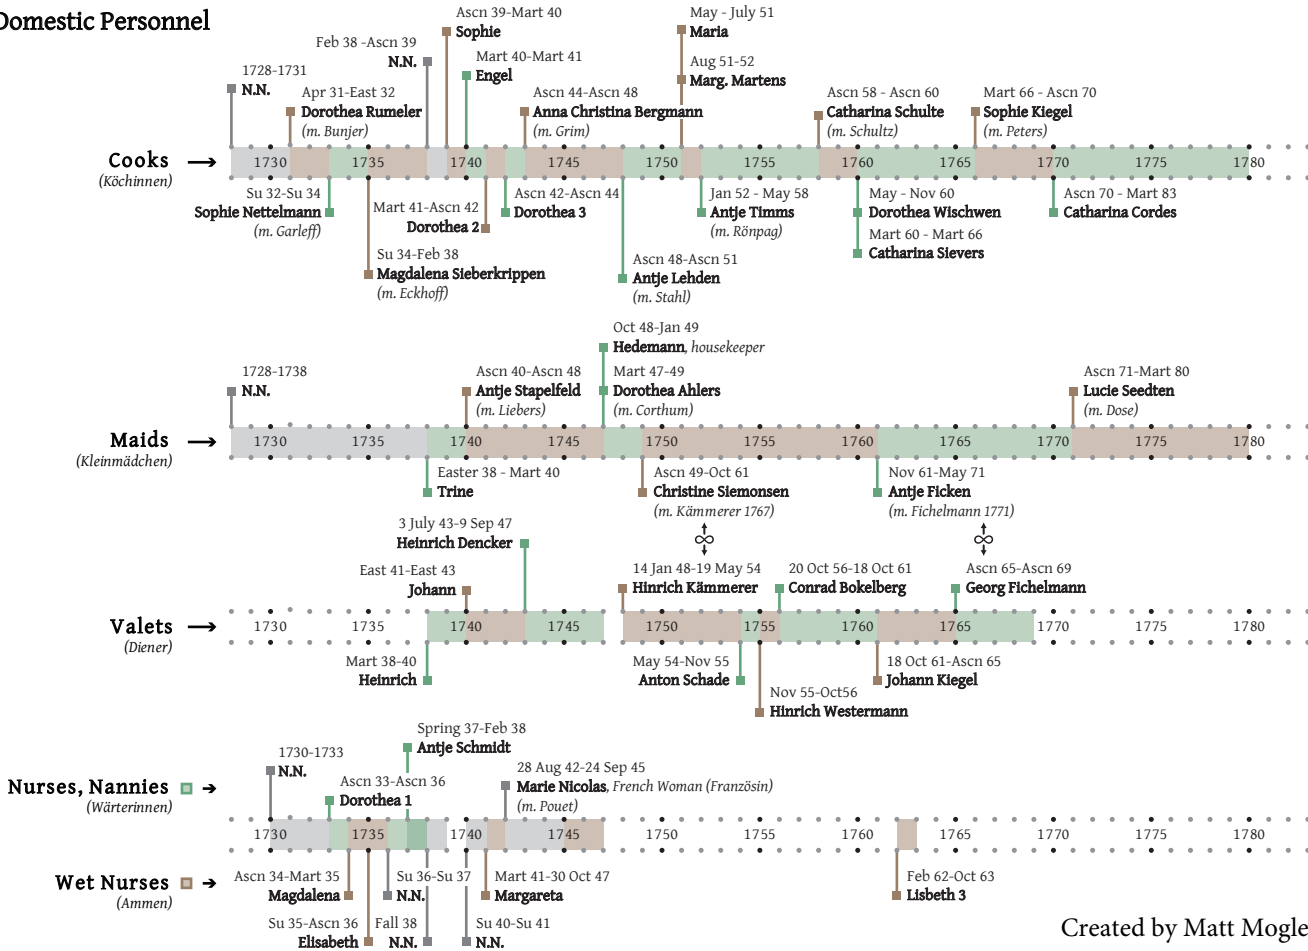

Supplement: Supplementary file 4 [file 1]
